# Supplementary material for: Knowledge, Attitudes, and Practices about the Prevention of Mosquito Bites and Zika Virus Disease in Pregnant Women in Greece
Source: PubMed Central journal article supplement (PMC5409568; doi:10.3390/ijerph14040367), 2017-03-31
Supplement: ijerph-14-00367-s001.pdf [file ijerph-14-00367-s001.pdf]

## List of questions

---

### Knowledge

- 1 Zika virus disease is transmitted with sexual intercourse
- 2 Zika virus disease is transmitted through the consumption of contaminated food
- 3 Zika virus disease is transmitted through bites of infected mosquitoes
- 4 Zika virus disease causes severe disease, bleeding and death
- 5 A pregnant woman can get sick from Zika virus disease
- 6 If a pregnant woman has Zika, she is at risk of miscarriage
- 7 If a pregnant woman has Zika, her foetus / baby is at risk of being born with Microcephaly
- 8 Is there any available treatment for Zika virus disease?
- 9 Is there any vaccine available against Zika?

### Attitudes

- 10 I believe that mosquito bites to pregnant women can affect the health of the foetus/baby
  - 11 If your doctor recommended everyday use of mosquito repellent lotion would you use it?
  - 12 I wouldn't use mosquito repellent because it might be dangerous for the foetus/baby
  - 13 I wouldn't use mosquito repellent because I don't believe it can protect myself and the foetus/baby
  - 14 I believe that travelling to countries with many cases of Zika virus disease should not be allowed
  - 15 If there was a vaccine available against Zika, would you consider having it?
  - 16 I believe that a pregnant woman can go on holidays to a country where
-

---

many cases of Zika virus disease have occurred without having any risk

17 Would you visit a country where many cases of Zika virus disease have occurred?

18 Do you take any measures to prevent mosquito bites the summer months during your pregnancy?

19 I take measures for mosquito bite prevention when I realise that there are mosquitoes around

20 I take measures for mosquito bite prevention when I visit places that mosquitoes might be present

21 I take measures for mosquito bite prevention every day during the daylight hours

22 I take measures for mosquito bite prevention every day during the evening and at night

23 I wear covering clothes to prevent mosquito bites

24 I use repellents to prevent mosquito bites

25 I use mosquito coil / repellent liquid vaporizers/tablet to keep mosquitoes away

---
